# Supplementary material
Source: PubMed Central journal article supplement (PMC7733062)

Supplementary File 2

Figure 1: Reasons for Starting Tobacco Farming in Malawi

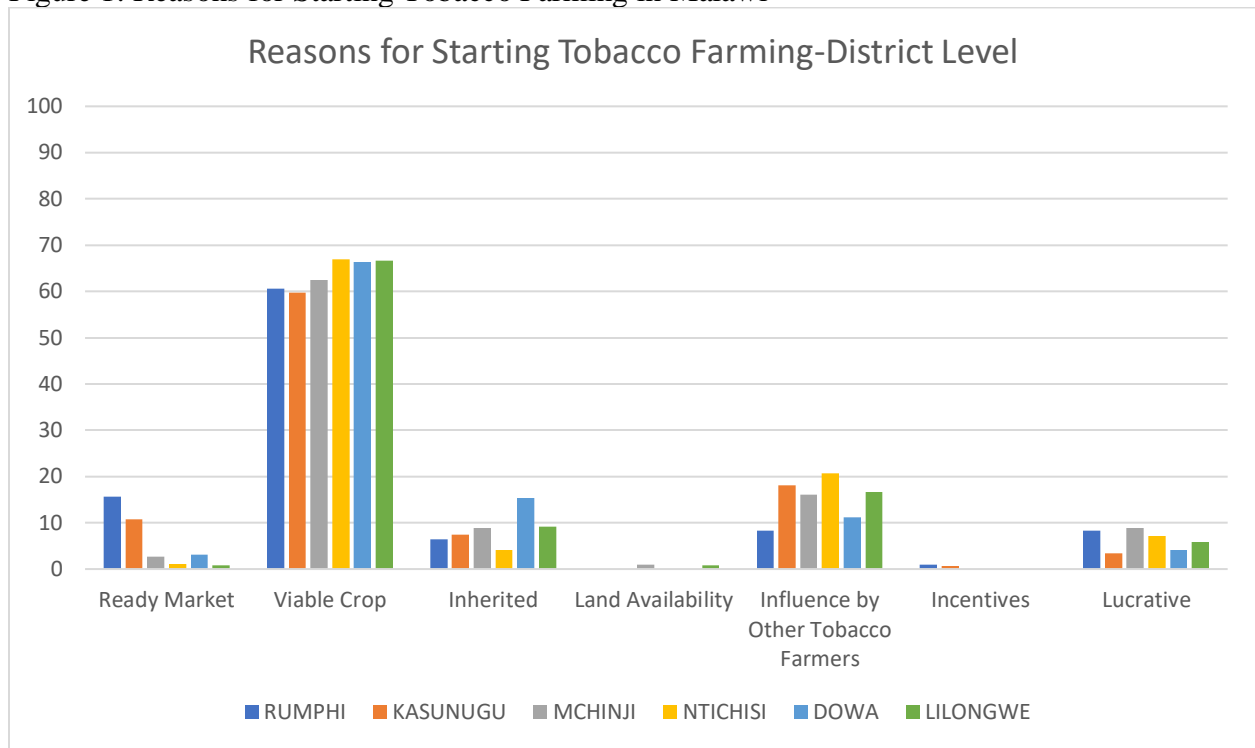

Figure 2: Reasons for Starting Tobacco Farming in Kenya

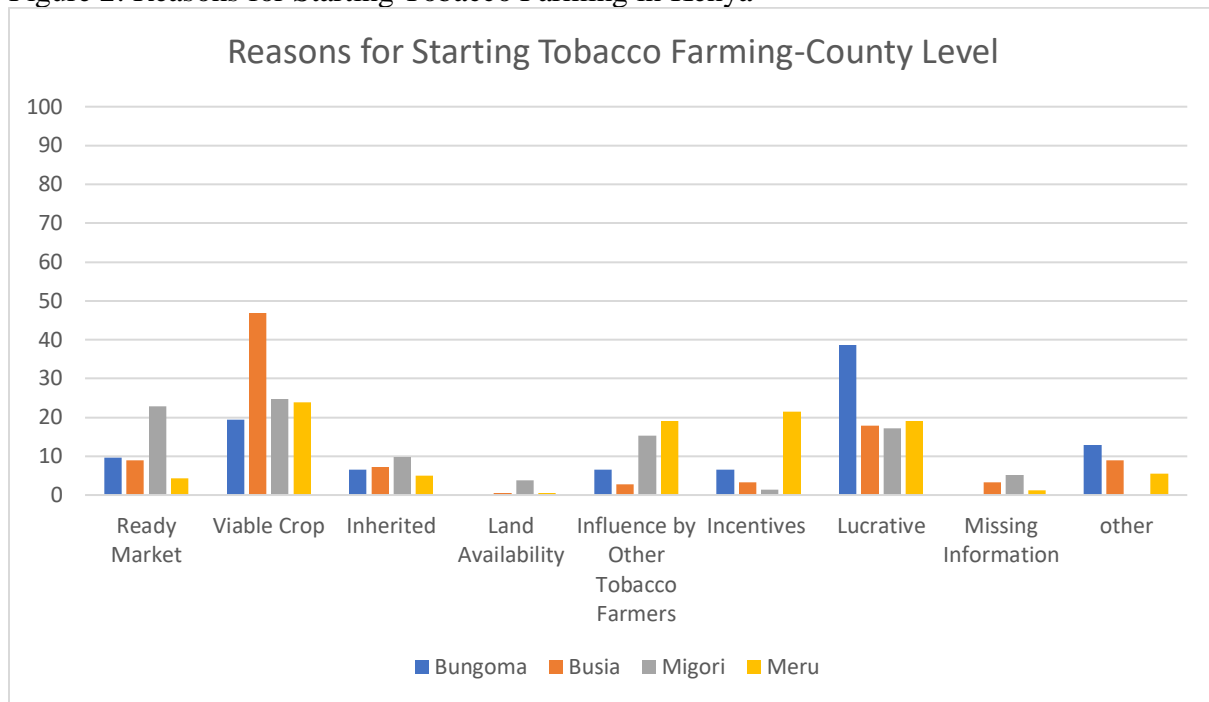

Figure 3: Reasons for Starting Tobacco Farming in Zambia

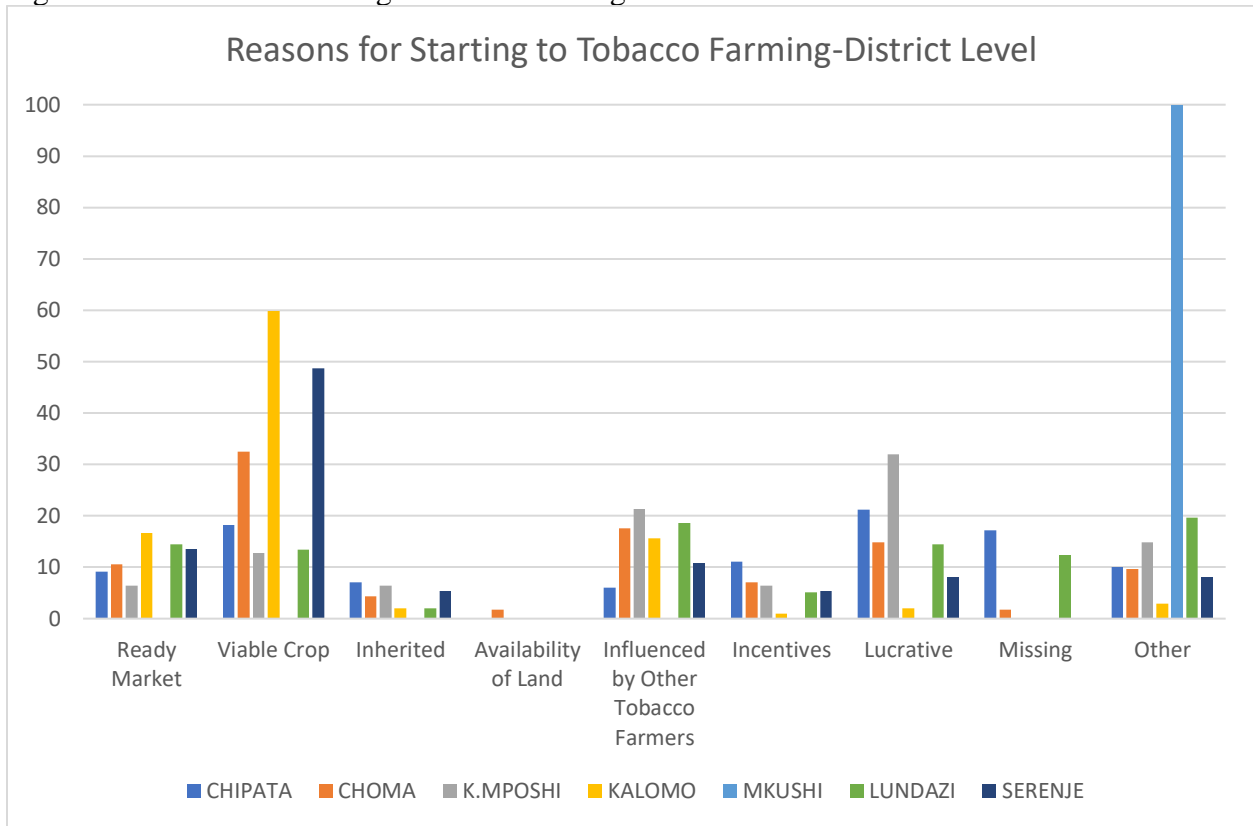

Supplement: ntz173_suppl_supplementary_figures.pdf [file ntz173_suppl_supplementary_figures.pdf]
